# Supplementary material for: αPD-1-mesoCAR-T cells partially inhibit the growth of advanced/refractory ovarian cancer in a patient along with daily apatinib
Source: PubMed Central journal article supplement (PMC7887368; doi:10.1136/jitc-2020-001162), 2021-02-13

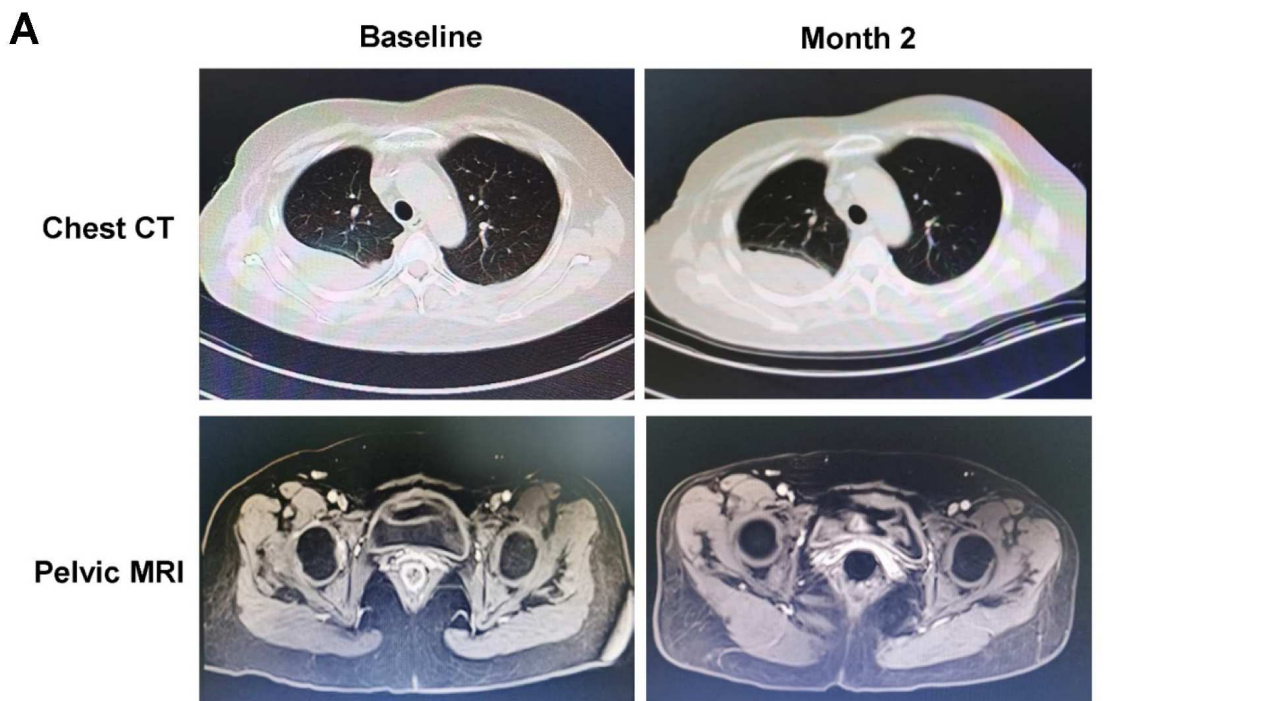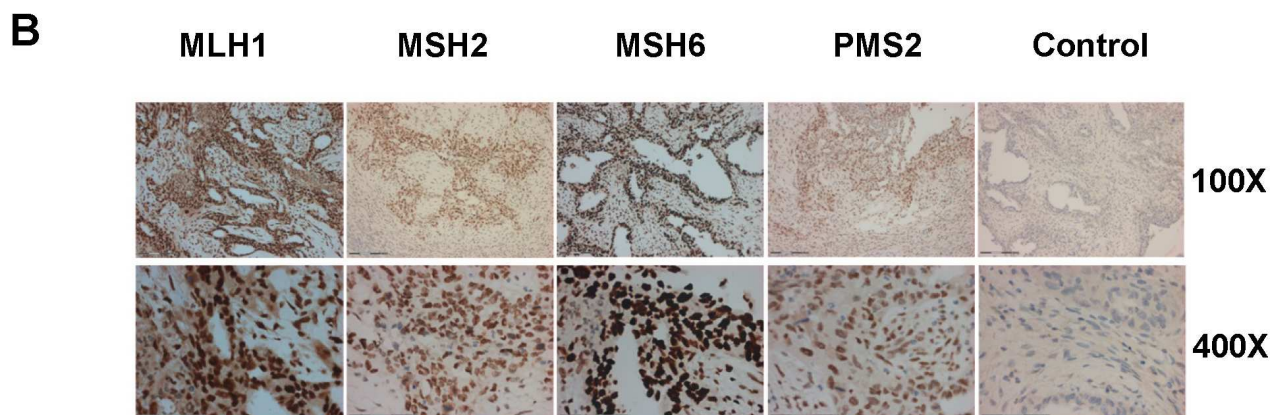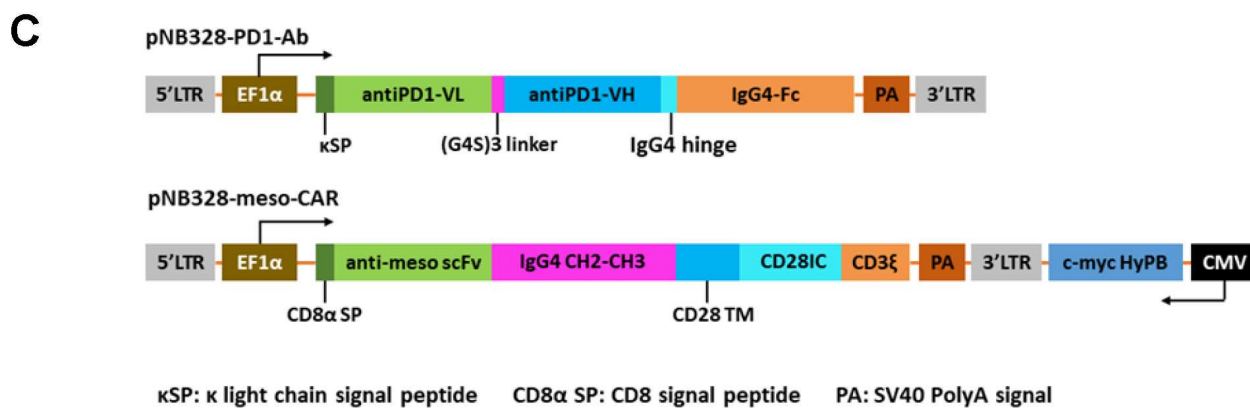

Supplement: jitc-2020-001162supp001.pdf [file jitc-2020-001162supp001.pdf]
