# Supplementary material for: αPD-1-mesoCAR-T cells partially inhibit the growth of advanced/refractory ovarian cancer in a patient along with daily apatinib
Source: PubMed Central journal article supplement (PMC7887368; doi:10.1136/jitc-2020-001162), 2021-02-13
Supplement: jitc-2020-001162supp002.pdf [file jitc-2020-001162supp002.pdf]

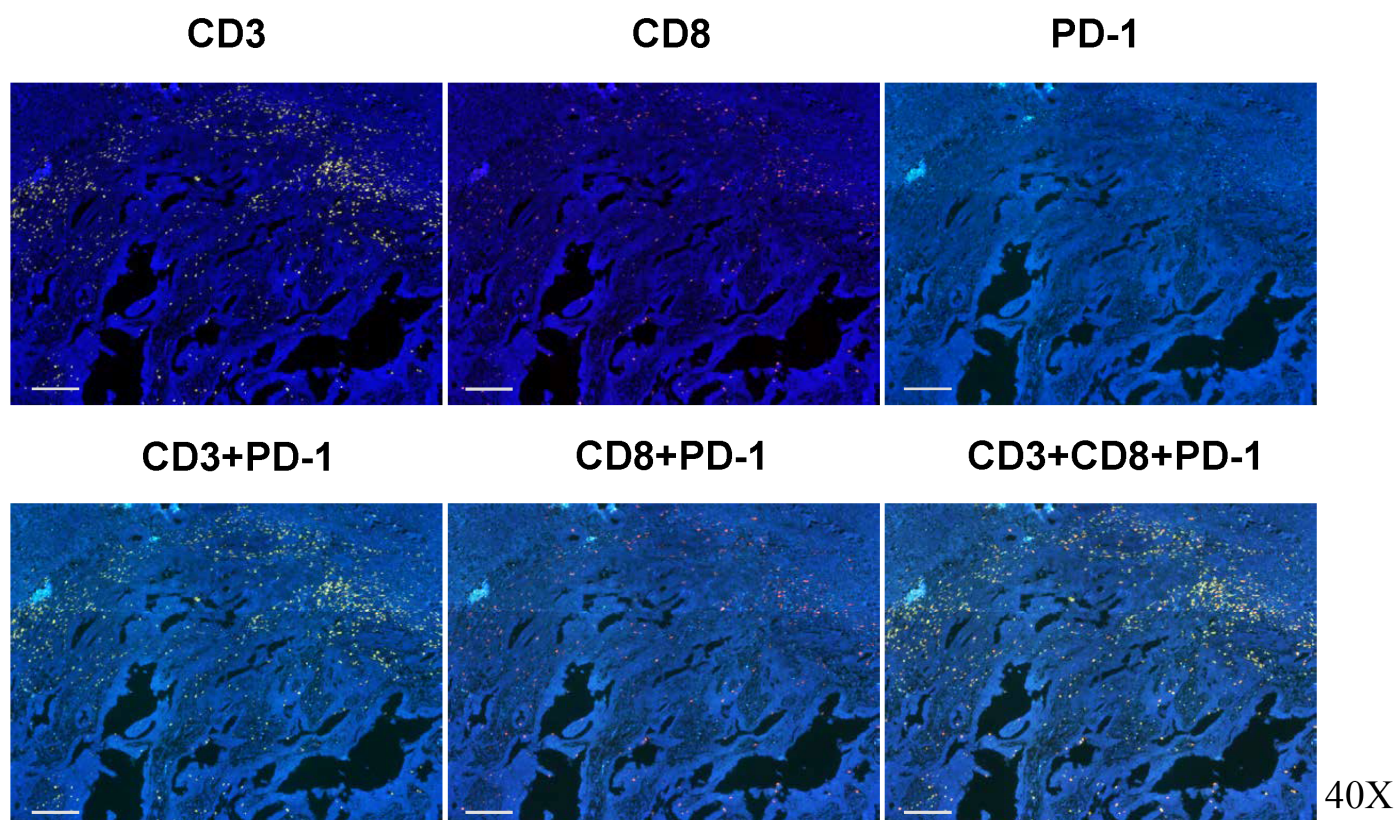

|        |          | positive % |     | positive% |      | positive% |
|--------|----------|------------|-----|-----------|------|-----------|
| Single | CD3      | 3.63       | CD8 | 1.67      | PD-1 | 1.57      |
| Double | CD3+PD-1 | 0.13       | CD3 | 3.55      | PD-1 | 1.51      |
| Double | CD8+PD-1 | 0.09       | CD8 | 1.54      | PD-1 | 1.44      |
