# Supplementary material for: αPD-1-mesoCAR-T cells partially inhibit the growth of advanced/refractory ovarian cancer in a patient along with daily apatinib
Source: PubMed Central journal article supplement (PMC7887368; doi:10.1136/jitc-2020-001162), 2021-02-13
Supplement: jitc-2020-001162supp003.pdf [file jitc-2020-001162supp003.pdf]

Supplemental Table 1. ctDNA sequencing of BRCA1/BRCA2 in patient's tumor specimen

| Gene  | cDNA changes | Amino acid changes | Mutation abundance |
|-------|--------------|--------------------|--------------------|
| BRCA1 | c.2082C>T    | p.(=)              | 50.89              |
| BRCA1 | c.134+111C>T | /                  | 50.24              |
| BRCA1 | c.4900A>G    | p.Ser1634Gly       | 50.01              |
| BRCA1 | c.5215+66G>A | /                  | 48.89              |
| BRCA1 | c.2612C>T    | p.Pro871Leu        | 48.45              |
| BRCA1 | c.3548A>G    | p.Lys1183Arg       | 48.01              |
| BRCA1 | c.3113A>G    | p.Glu1038Gly       | 47.67              |
| BRCA1 | c.2311T>C    | p.(=)              | 45.59              |
| BRCA2 | c.4563A>G    | p.(=)              | 100                |
| BRCA2 | c.-26G>A     | /                  | 53.08              |
| BRCA2 | c.7806-14T>C | /                  | 50.44              |
| BRCA2 | c.7242A>G    | p.(=)              | 49.39              |
| BRCA2 | c.3396A>G    | p.(=)              | 49.11              |
| BRCA2 | c.3807T>C    | p.(=)              | 48.2               |

Note: BRCA1, Breast cancer susceptibility Gene1; BRCA2, Breast cancer susceptibility Gen2.

Supplemental Table 2. ctDNA sequencing of 17 common genes in patient's tumor specimen

| <b>Gene</b> | <b>Mutation</b> |
|-------------|-----------------|
| AKT1        | None            |
| BRAF        | None            |
| CTNNB1      | None            |
| MLH1        | None            |
| MET         | None            |
| CDH1        | None            |
| ERBB2       | None            |
| ERBB4       | None            |
| EGFR        | None            |
| FGFR1       | None            |
| FGFR2       | None            |
| FGFR3       | None            |
| KRAS        | None            |
| PIK3CA      | None            |
| PTEN        | None            |
| GNAS        | None            |
| P53         | None            |

Note:CTNNB1, Catenin Beta 1; MLH1, DNA mismatch repair protein mutL homolog 1; CDH1, Cadherin-1; ERBB2, Receptor tyrosine-protein kinase erbB-2; ERBB4, Receptor tyrosine-protein kinase erbB-2; EGFR, Epidermal growth factor receptor; FGFR, Fibroblast growth factor receptor 1; PIK3CA, Phosphatidylinositol 3-kinase, catalytic subunit alpha.

Supplemental Table 3. Characterization of the CAR-T cells

|          | Total cells          | Cell activity (%) | CD3+ (%) | CD3+MSLN+ (%) | CD3+CD8+ MSLN+ (%) | CD3+CD4+ MSLN+ (%) | copies number/cell | PD-1 antibody (ng/ml) | Bacteria |
|----------|----------------------|-------------------|----------|---------------|--------------------|--------------------|--------------------|-----------------------|----------|
| 20181208 | 0.35x10 <sup>8</sup> | 96.08             | 70.60    | 40.63         | 29.29              | 10.49              | 25.70              | 34.71                 | negative |
| 20190308 | 0.57x10 <sup>8</sup> | 90.00             | 88.56    | 56.68         | 34.85              | 20.65              | 31.10              | 40.09                 | negative |

Note: Cell activity was determined by Smart Cell Counter NucleoCounter® NC-200TM (ChemoMetec, Danmark). 200 µL suspended cells was added into Vial-Cassette™ containing dried acridine orange (AO) and DAPI dyes. Dead cells were dyed with AO/PI and counted by NucleoCounter. The results showed as (total cells-dead cells)/ total cells x 100/100. Secreted PD-1 antibody by CAR-T cells was measured by ELISA. PD-1 antigen proteins, purchased from Abcam (ab174035), were dissolved in sterile PBS to a concentration of 0.5µg/ml. 100µl of the antigen solution or PBS was added to 96-well plates for overnight, respectively. After blocking with 1% goat serum for 1 hour at room temperature, 100µl of samples was added to control and test plates. These plates were incubated at 37°C for 45min and then washed five times with PBS. 100µl of substrate solution (tetramethyl benzidine) was added to each well in dark for 10 min and the plates were read at OD450nm by an ELISA reader.

Supplemental Data Table 4. Measurement of leukocyte and lymphocyte subsets before and after the CAR-T treatment

A. Measurement of leukocyte subsets before and after the CAR-T treatment

|        | White cells<br>(10 <sup>9</sup> /L) | Monocytes<br>(10 <sup>9</sup> /L) | Neutrophils<br>(10 <sup>9</sup> /L) | Lymphocytes<br>(10 <sup>9</sup> /L) |
|--------|-------------------------------------|-----------------------------------|-------------------------------------|-------------------------------------|
| Before | 5.91                                | 0.34                              | 3.9                                 | 1.45                                |
| After  | 5.14                                | 0.25                              | 2.9                                 | 1.67                                |

B. Measurement of lymphocyte subsets before and after the CAR-T treatment

| (Numbers/ul)  | Before | Month 1 | Month 3 |
|---------------|--------|---------|---------|
| Total T cells | 1220   | 1096    | 1202    |
| CD8+ T cell   | 352    | 522     | 612     |
| CD4+ T cell   | 800    | 512     | 522     |
| CD4/CD8       | 2.27   | 0.98    | 0.85    |

Note: Lymphocyte subsets were detected by flow cytometry.
